# Supplementary material
Source: publisher figshare collection journal article supplement (https://rs.figshare.com/ndownloader/files/13439813)
Supplement: Supplementary file 1 [file 13439813]

# Variability in life-history switch points across and within populations explained by Adaptive Dynamics

Pietro Landi<sup>1,\*</sup>

James R. Vonesh<sup>2,3</sup>

Cang Hui<sup>1,4</sup>

1. Theoretical Ecology Group, Department of Mathematical Sciences, Stellenbosch University, Matieland 7602, South Africa;

2. Center for Environmental Studies, Virginia Commonwealth University, Richmond, Virginia 23284-2012;

3. Centre for Invasion Biology, Department of Botany and Zoology, Stellenbosch University, Matieland 7602, South Africa;

4. Mathematical and Physical Biosciences, African Institute for Mathematical Sciences, Muizenberg 7945, South Africa;

\* Corresponding author; e-mail: landi@sun.ac.za

*Journal of the Royal Society Interface*

## Supplementary figure

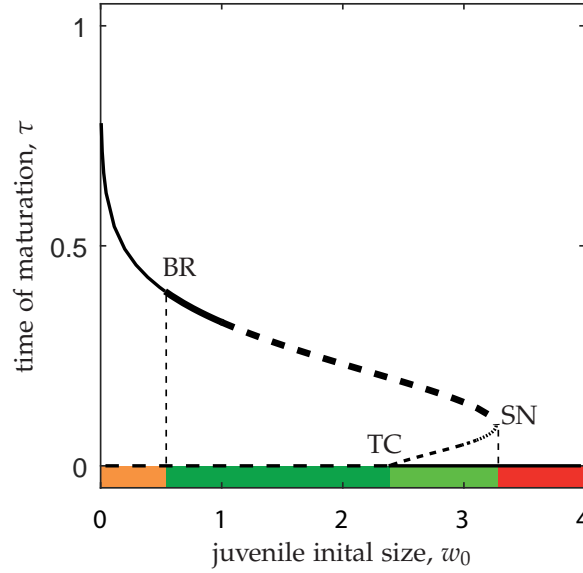

Figure S1: Scenarios for time of maturation under different juvenile initial sizes computed with logistic growth function  $w(\tau) = g(w_0, \tau) = w_0 w_K \exp(r\tau) / (w_K + w_0(\exp(r\tau) - 1))$ . Orange interval: internal Evolutionary Stable Strategy (ESS)  $0 < \bar{\tau} < 1$ . Parameters as in figure 4a in the main text except  $w_K = 10$ . Dark green interval: branching point (within-population variability). Light green interval: either branching point or boundary strategy  $\bar{\tau} = 0$  (across- and within-population variability). Red interval: direct development. Solid line: convergence stable equilibria (attracting strategies). Dashed line: convergence unstable equilibria (repelling strategies). Thick line: convergence stable but evolutionary unstable equilibria (branching points). TC: transcritical bifurcation. BR: branching bifurcation ( $B = 0$  in equation (6) in the main text), turning selection disruptive. SN: saddle-node bifurcation.
